# Supplementary material
Source: PubMed Central journal article supplement (PMC6822228)
Supplement: mmc1.pdf [file mmc1.pdf]

**YMTHE, Volume 27**

**Supplemental Information**

**Homologous Recombination-Based Genome  
Editing by Clade F AAVs Is Inefficient in the Absence  
of a Targeted DNA Break**

**Geoffrey L. Rogers, Hsu-Yu Chen, Heidy Morales, and Paula M. Cannon**

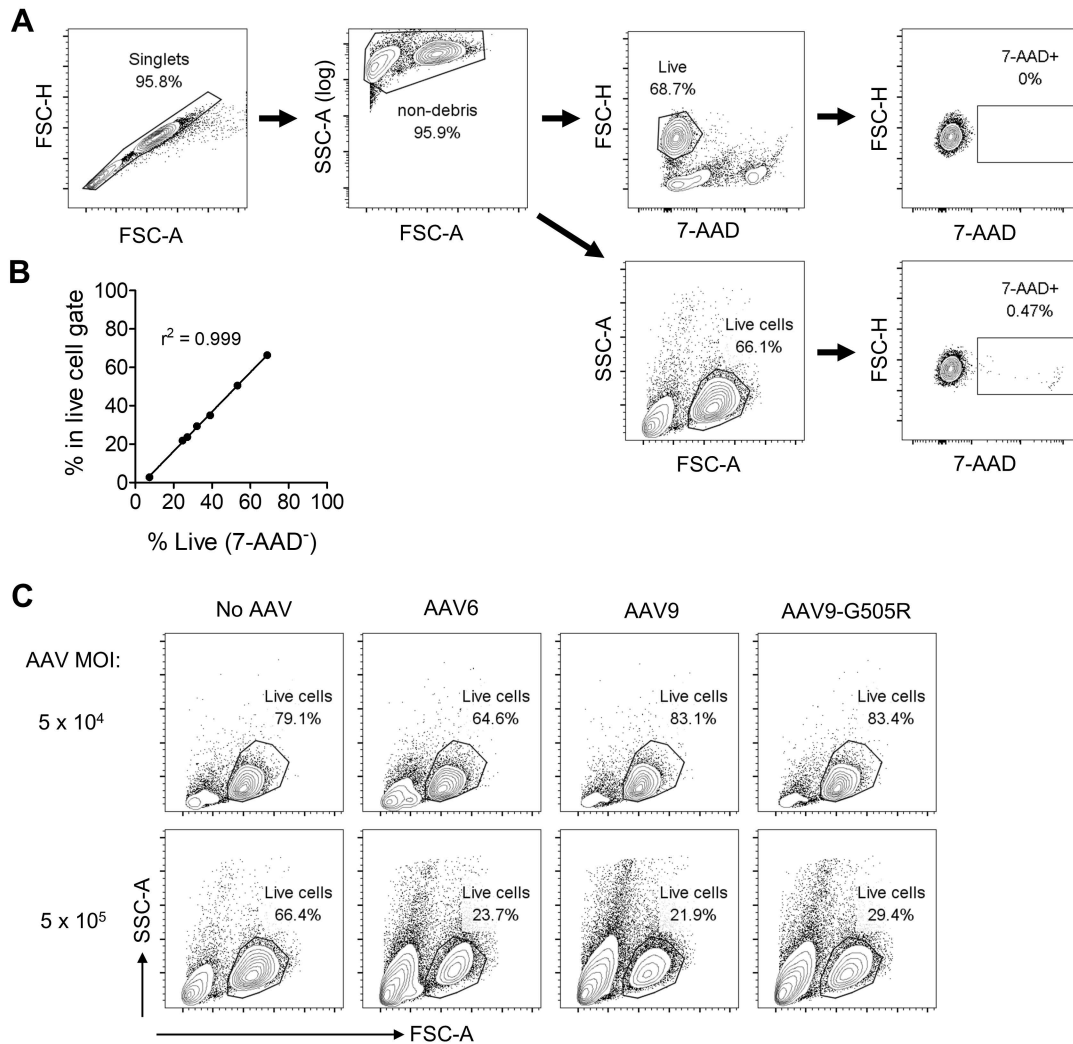

**Figure S1. Strategy for determining cell viability of HSPCs after AAV transduction.** (A) Gating scheme for the live cell gate compared to a live gate using the viability dye 7-AAD. (B) Correlation between cells in the live cell gate and those determined using 7-AAD across several samples validates this method of viability analysis. (C) Flow cytometry of cells in the live cell gate after 2 days for cells treated with AAV vectors of all 3 serotypes with CCR5-PGK-GFP genomes at the indicated MOI. The transductions at different MOIs were performed on 2 different sources of CD34<sup>+</sup> HSPCs.
